# Supplementary material for: Chiral nematic organo-siloxane oligopodes based on an axially chiral binaphthalene core
Source: Royal Society of Chemistry journal article supplement (doi:10.1039/c2cc33050d), 2012-01-01

# **Chiral nematic organo-siloxane oligopodes based on an axially chiral binaphthalene core**

Christopher P. J. Schubert, M. Gabriela Tamba and Georg, H. Mehl<sup>\*</sup>

*Department of Chemistry, University of Hull, Hull, UK, HU6 7RX*

## **Supplementary Information**

**Experimental Details**

**Liquid Crystal Analysis**

## **General Procedures**

All reactions were performed under inert conditions, using dry solvents where stated. Tetrahydrofuran and dimethoxyethane were freshly distilled from sodium and benzophenone. Toluene and dichloromethane were freshly distilled from calcium hydride. Other solvents were SLR-grade and used without further purification. Unless otherwise stated, all chemicals were obtained from commercial sources and used as received.  $^1\text{H}$  NMR 400 MHz,  $^{13}\text{C}$  NMR 101 MHz and were recorded on a JEOL Eclipse 400 FT NMR spectrometer at ambient temperatures. All NMR spectra were carried out using deuterated chloroform unless otherwise stated. EI, CI, MALDI and HRMS mass spectra were obtained *via* the EPSRC National Mass Spectrometry Service Centre at Swansea University, Wales.

DSC data was collected on a Mettler-Toledo DSC822e. Optical rotations were recorded on a Polaar 3001 polarimeter in the solvents stated, with concentrations quoted in grams per mL. X-ray diffraction experiments were performed on a MAR345 diffractometer with a 2D image plate detector ( $\text{CuK}\alpha$  radiation, graphite monochromator,  $\lambda = 1.54 \text{ \AA}$ ). The samples were heated in the presence of a magnetic field using a home-built capillary furnace. Mesophase behaviour of the samples carried out using an Olympus BX51 polarising microscope. The microscope was equipped with a Mettler-Toledo FP900 heating stage

## **Experimental Procedures**

### **(S)-(-)-2,2-Di(pent-4-enyl)oxy-1,1'-binaphthalene (4)**

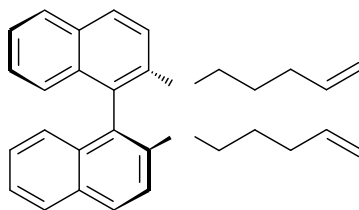

To a solution of (*S*)-1,1-bi(2-naphthol) (2.27 g, 7.93 mmol) in acetonitrile (35 mL) was added potassium carbonate (5.48 g, 39.65 mmol) and 5-bromopentene (4.73 g, 31.71 mmol, 3.8 mL) and the mixture was heated to reflux for 48 hours. The mixture was cooled, filtered and the solvent removed under reduced pressure. The crude product was dissolved in dichloromethane (25 mL), washed with 1M HCl (25 mL), water (25 mL), brine (25 mL), dried (Na<sub>2</sub>SO<sub>4</sub>) and the solvent removed under reduced pressure. Purification by silica gel column chromatography (Hexane/DCM 2:1) afforded the title compound as a pale yellow oil (3.23 g, 96%);  $\delta_{\text{H}}$  (400 MHz, CDCl<sub>3</sub>) 7.94 (2H, d, *J* 8.9), 7.87 (2H, d, *J* 8.1), 7.42 (2H, d, *J* 8.9), 7.32 (2H, m), 7.20 (4H, m), 5.54 (2H, ddt, *J* 16.9, 10.2, 6.6), 4.77 (4H, m), 3.96 (4H, m), 1.69 (4H, m), 1.51 (4H, m);  $\delta_{\text{C}}$  (101 MHz, CDCl<sub>3</sub>) 154.34, 137.99, 134.17, 129.23, 129.05, 127.76, 126.05, 125.45, 123.41, 120.59, 115.67, 114.51, 68.83, 29.67, 28.55;

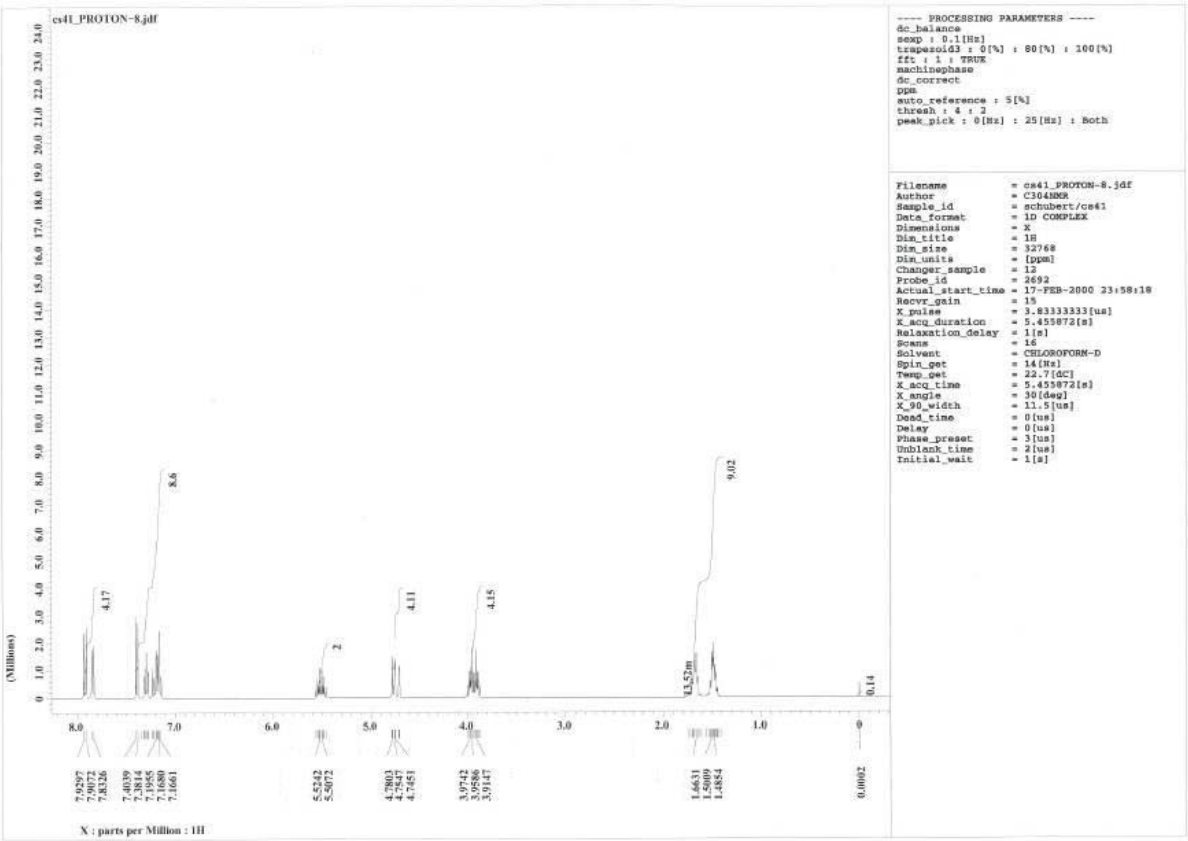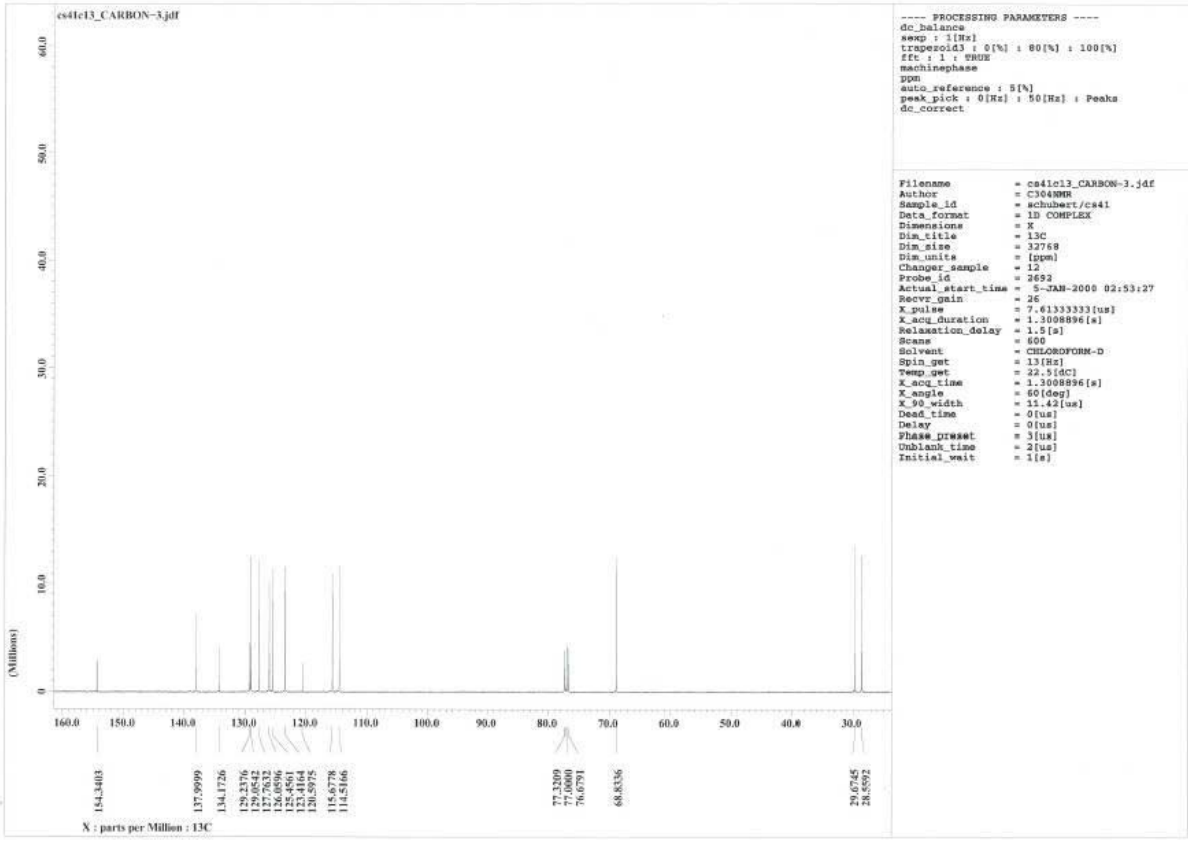

**(S)-(-)-6,6'-Dibromo-2,2'-dihydroxy-1,1'-binaphthalene (5)**

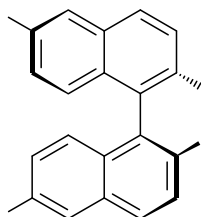

(S)-1,1'-Bi(2-naphthol) (10.10 g, 35.27 mmol) was dissolved in dichloromethane (150 mL) and cooled to -78 °C. A solution of bromine (14.09 g, 88.18 mmol, 4.5 mL) in dichloromethane (10 mL) was added dropwise to over 30 minutes with vigorous stirring. The solution was allowed to warm to ambient temperature over 2.5 hours and stirred for a further 12 hours. Aqueous sodium sulphite solution (10%, 100 mL) was added and the mixture stirred for a further 30 minutes. The layers were separated and the organic layer was washed with water (100 mL), brine (100 mL), dried (Na<sub>2</sub>SO<sub>4</sub>) and filtered. The solvent was removed under reduced pressure to afford the title compound as a brown solid (15.57 g, 99%), m.p. 197-199 °C, (lit 197-198 °C).  $\delta_{\text{H}}$  (400 MHz, CDCl<sub>3</sub>) 8.04 (2H, d, *J* 2.0), 7.89 (2H, d, *J* 8.9), 7.38 (2H, d, *J* 8.9), 7.36 (2H, dd, *J* 8.9, 2.0), 6.96 (2H, d, *J* 8.9), 2.14 (2H, s).

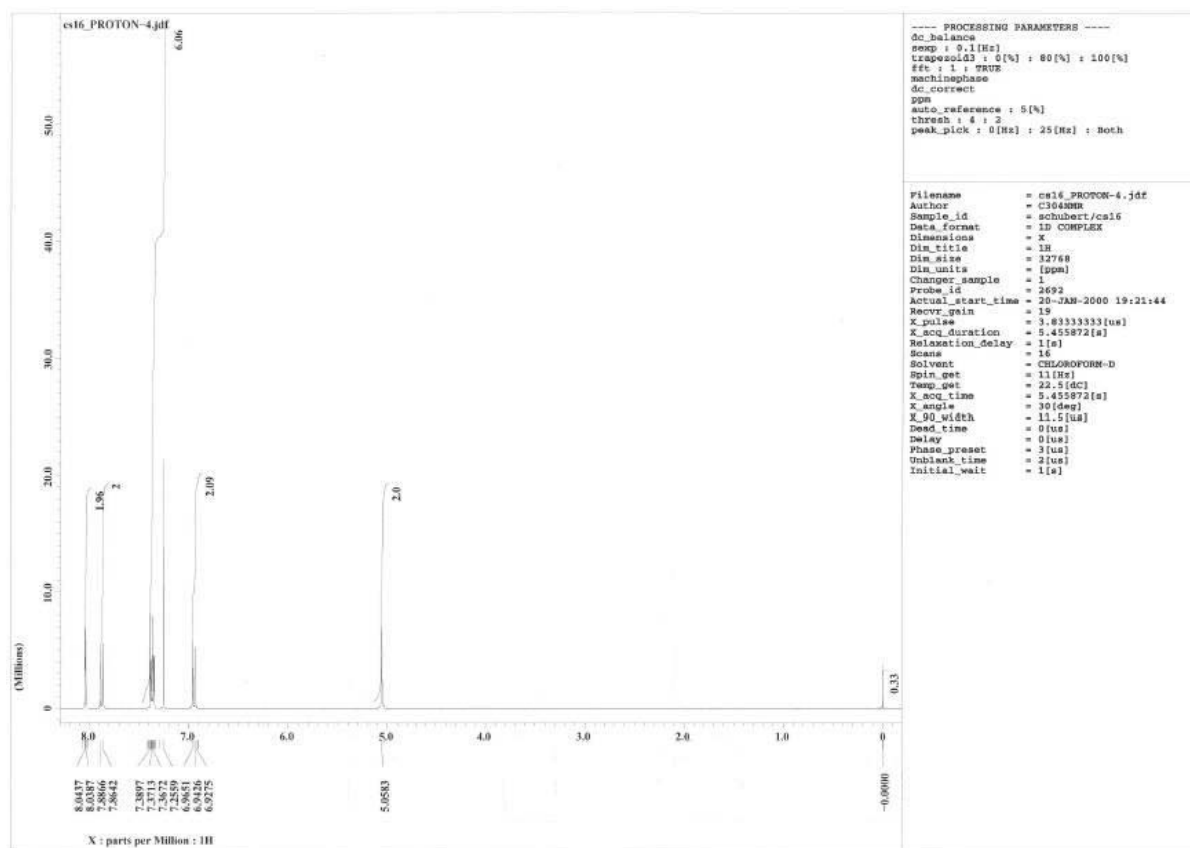

**(S)-(-)-6,6'-Dibromo-2,2'-di(pent-4-enyl)oxy-1,1'-binaphthalene (6)**

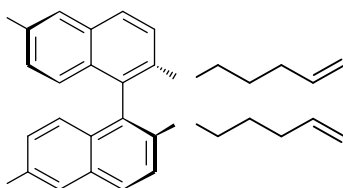

To a solution of (S)-6,6'-dibromo-2,2'-dihydroxy-1,1'-binaphthalene **5** (3.02 g, 6.80 mmol) in acetonitrile (40 mL) was added potassium carbonate (4.69 g, 34.00 mmol) and 5-bromopentene (4.05 g, 27.19 mmol, 3.2 mL) and the mixture was heated to reflux for 48 hours. The mixture was cooled, filtered and the solvent removed under reduced pressure. The product was dissolved in dichloromethane (25 mL) and washed with 1M HCl (25 mL), water (25 mL), brine (25 mL), dried (Na<sub>2</sub>SO<sub>4</sub>) and the solvent removed under reduced pressure. Purification by silica gel column chromatography (Hexane/DCM 2:1) afforded the *title compound* as a yellow oil (3.58 g, 91%);  $\delta_{\text{H}}$  (400 MHz, CDCl<sub>3</sub>) 8.00 (2H, d, *J* 2.0), 7.84 (2H, d, *J* 9.0), 7.40 (2H, d, *J* 9.0), 7.27 (2H, d, *J* 9.0, 2.0), 6.98 (2H, d, *J* 9.0), 5.37 (2H, m), 4.78 (4H, m), 3.94 (4H, m), 1.705 (4H, m);  $\delta_{\text{C}}$  (101 MHz, CDCl<sub>3</sub>) 154.56, 137.71, 132.52, 130.17, 129.76, 129.48, 128.42, 127.06, 119.93, 117.25, 116.25, 114.74, 68.62, 29.64, 28.42; *m/z* (CI) 598.0 (M+NH<sub>4</sub><sup>+</sup>, 100%); HRMS Found: 598.0775 C<sub>30</sub>H<sub>32</sub>Br<sub>2</sub>NO<sub>2</sub> (M+NH<sub>4</sub><sup>+</sup>) Requires 598.0776.

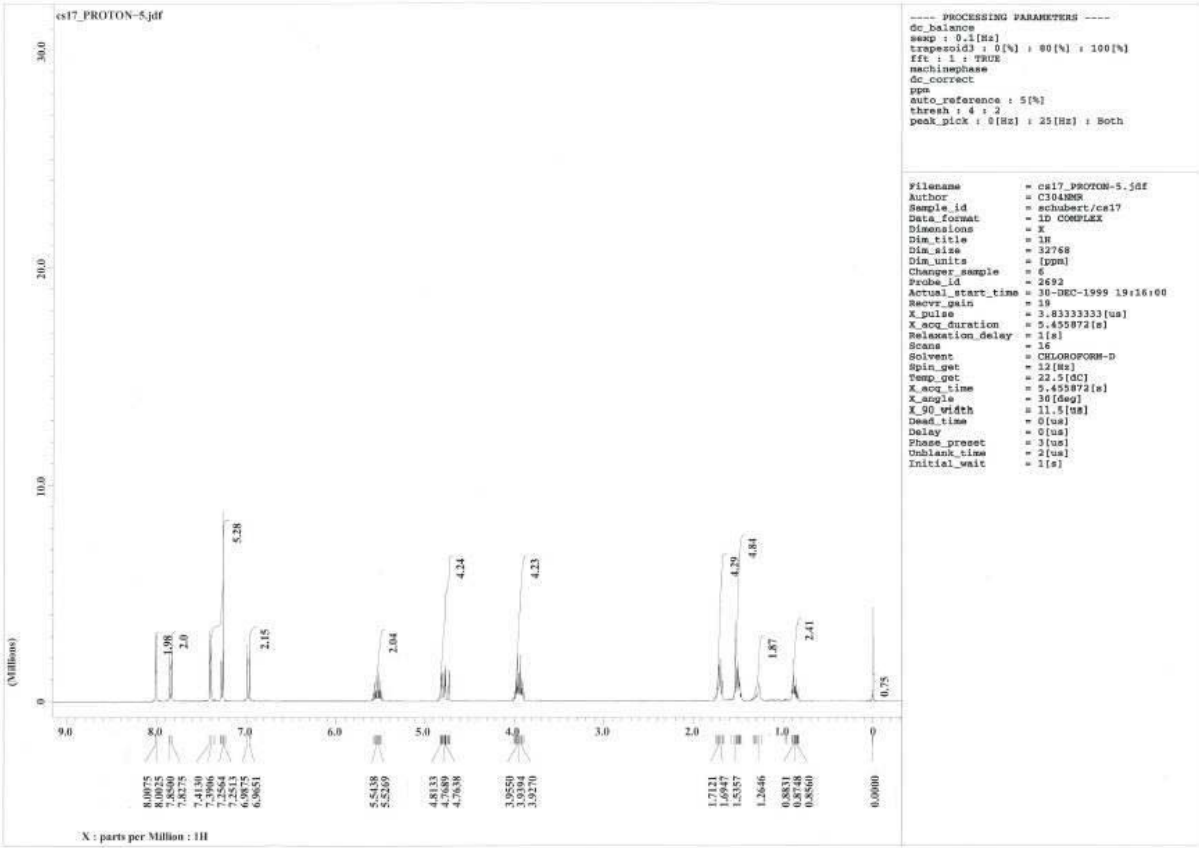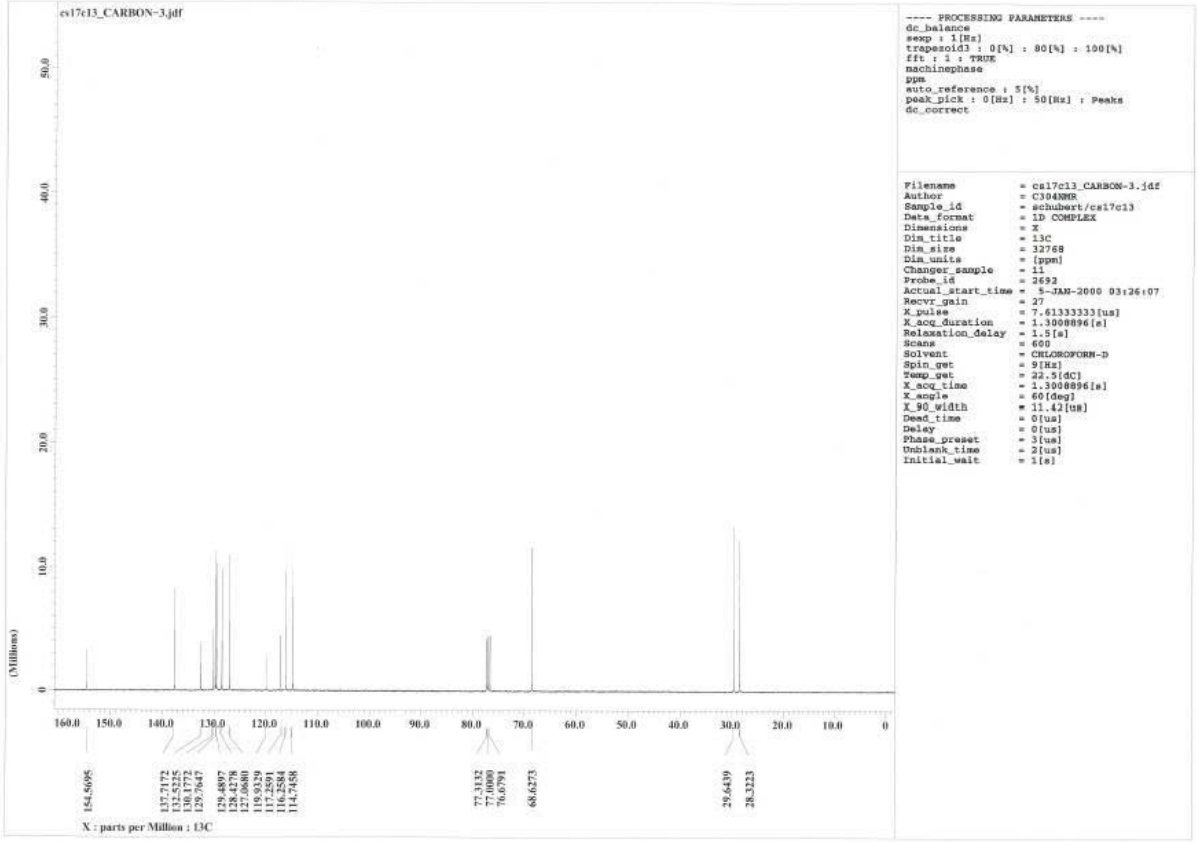

CS41 MW=422?  
(DCM)/MeOH + NH<sub>4</sub>OAc

EPSRC National Centre Swansea  
LTQ Orbitrap XL

Chris Schubert  
17/10/2011 16:44:10

HULMEH088-OV-HNESP #3-7 RT: 0.28-0.55 AV: 4 SM: 7G NL: 1.12E7  
T: FTMS + p NSI Full ms [120.00-2000.00]

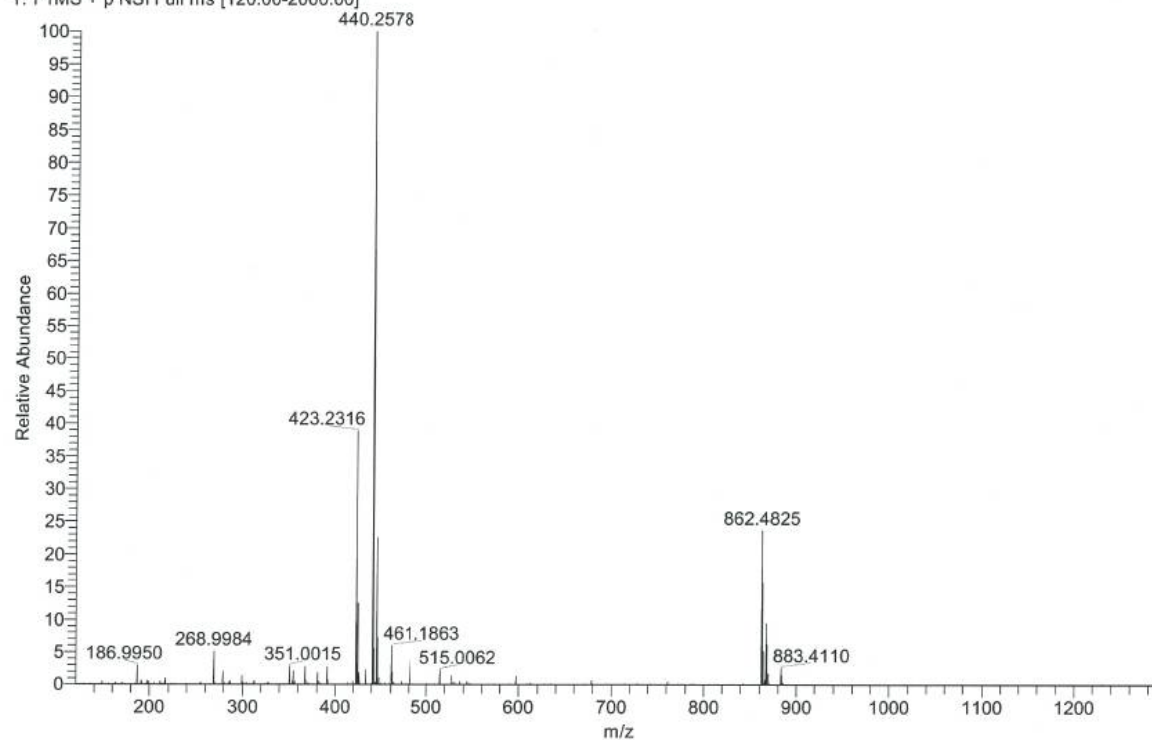

CS106 MW=580?  
(DCM)/MeOH + NH<sub>4</sub>OAc  
SM: 7G

EPSRC National Centre Swansea  
LTQ Orbitrap XL

Chris Schubert  
21/10/2011 12:20:26

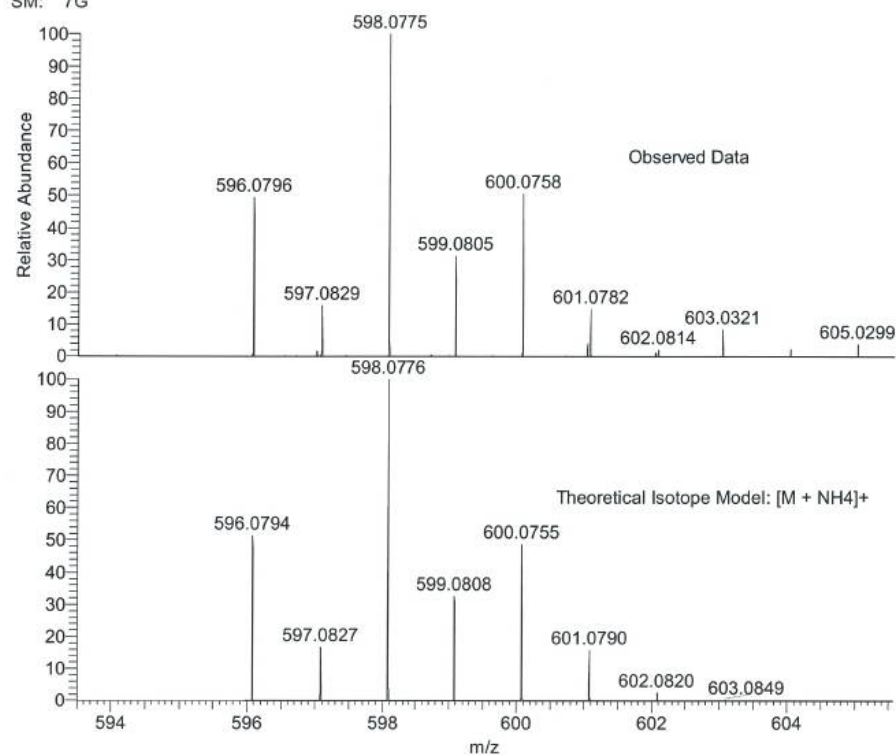

NL:  
2.47E6  
HULMEH090-OV-HNESP-2#19-  
33 RT: 0.85-1.26 AV: 15 T:  
FTMS + p NSI Full ms  
[120.00-2000.00]

NL:  
8.40E3  
C<sub>30</sub>H<sub>28</sub>Br<sub>2</sub>O<sub>2</sub>NH<sub>4</sub><sup>+</sup>  
C<sub>30</sub>H<sub>32</sub>Br<sub>2</sub>O<sub>2</sub>N<sub>1</sub>  
p (gss, s /p:40) Chrg 1  
R: 100000 Res .Pwr . @FWHM

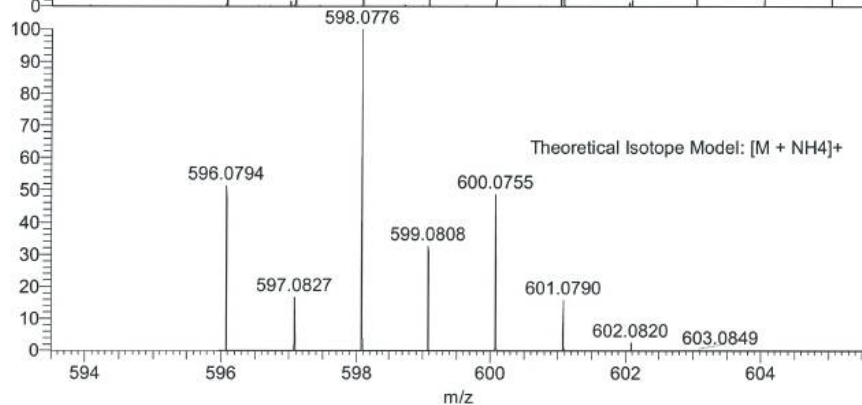

**(S)-(-)-6,6'-Di(prop-2-enyl)-2,2'-di(pent-4-enyl)oxy-1,1'-binaphthalene (7)**

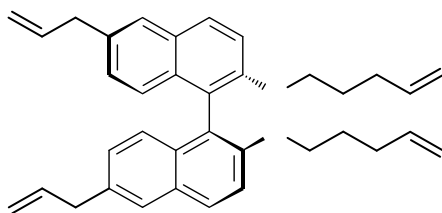

(S)-6,6'-Dibromo-2,2'-di(pent-4-enyl)oxy-1,1'-binaphthalene **6** (0.24 g, 0.41 mmol), caesium fluoride (0.19 g, 1.24 mmol) and 2mol% PdCl<sub>2</sub>(dppf) (6.69 mg, 8.20 μmol) were dissolved in degassed dimethoxymethane (5 mL) under an inert atmosphere. Allylboronic acid pinacol ester (0.21 g, 1.24 mmol) was added and the reaction mixture heated to 60 °C for 16 hours. The crude product was diluted with dichloromethane (15 mL), filtered through celite and the solvent removed under reduced pressure. Purification by silica gel column chromatography (Hexane/DCM 4:1) afforded the *title compound* as a colourless oil (0.20 g, 95%); δ<sub>H</sub> (400 MHz, CDCl<sub>3</sub>) 8.17 (2H, d, *J* 9.9), 7.91 (2H, s), 7.62 (2H, d, *J* 9.9), 7.29 (4H, m), 6.13 (2H, ddt, *J* 18.6, 11.1, 7.4), 5.58 (2H, ddt, *J* 18.8, 11.3, 7.3), 5.09 (4H, m), 4.71 (4H, m), 3.80 (4H, m), 3.31 (4H, m), 1.30 (4H, m), 1.09 (4H, m); δ<sub>C</sub> (101 MHz, CDCl<sub>3</sub>) 154.03, 138.08, 137.54, 134.96, 132.84, 129.45, 128.55, 127.66, 126.49, 125.65, 120.73, 115.94, 115.76, 114.48, 69.00, 40.12, 29.73, 28.61; *m/z* (CI) 520.3 (M+NH<sub>4</sub><sup>+</sup>, 100%), 503.2 (M+H<sup>+</sup>, 31); HRMS Found: 520.3208 C<sub>36</sub>H<sub>42</sub>NO<sub>2</sub> (M+NH<sub>4</sub><sup>+</sup>) Requires 520.3210.

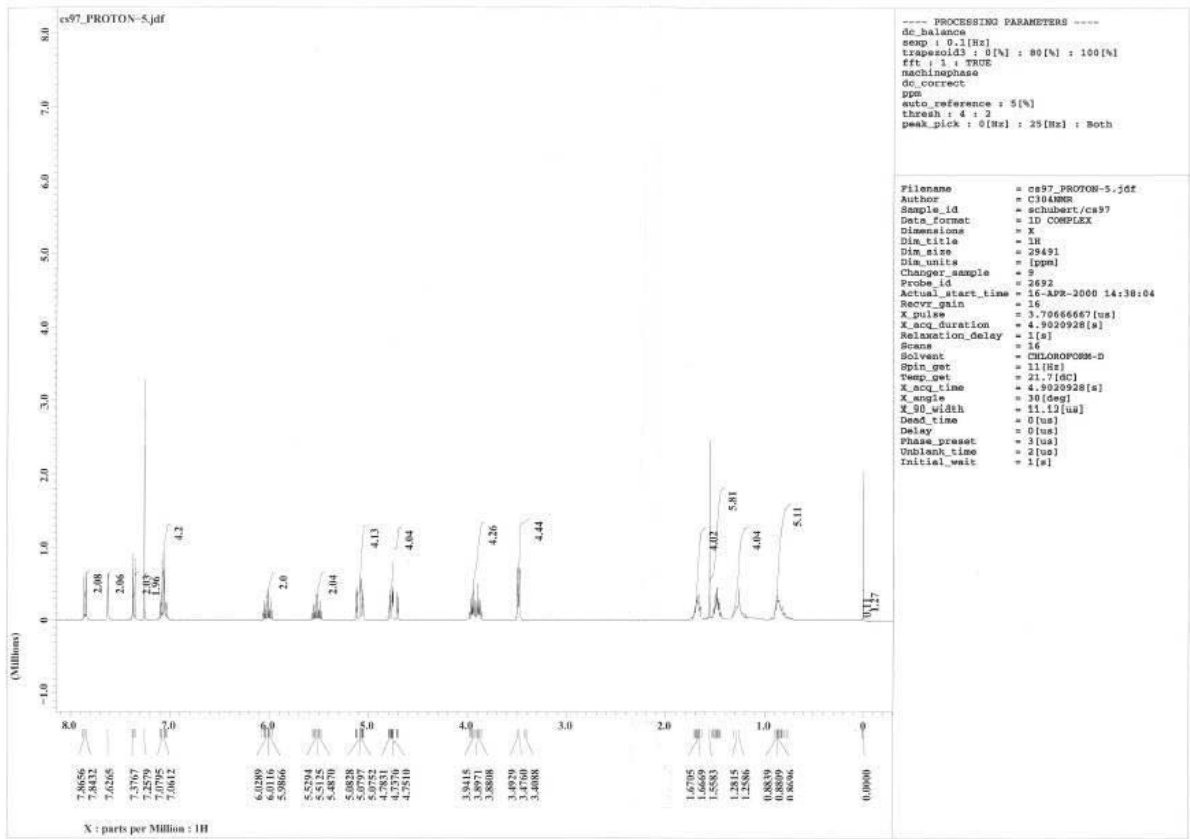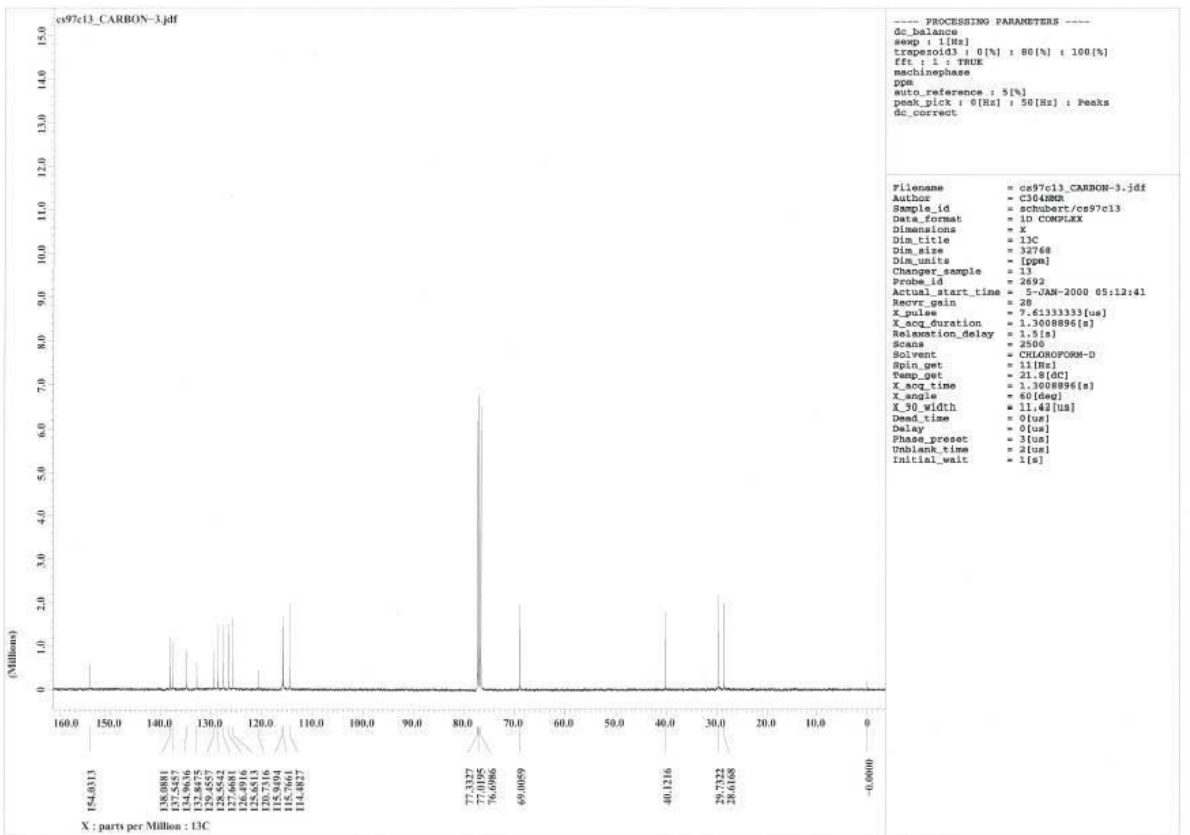

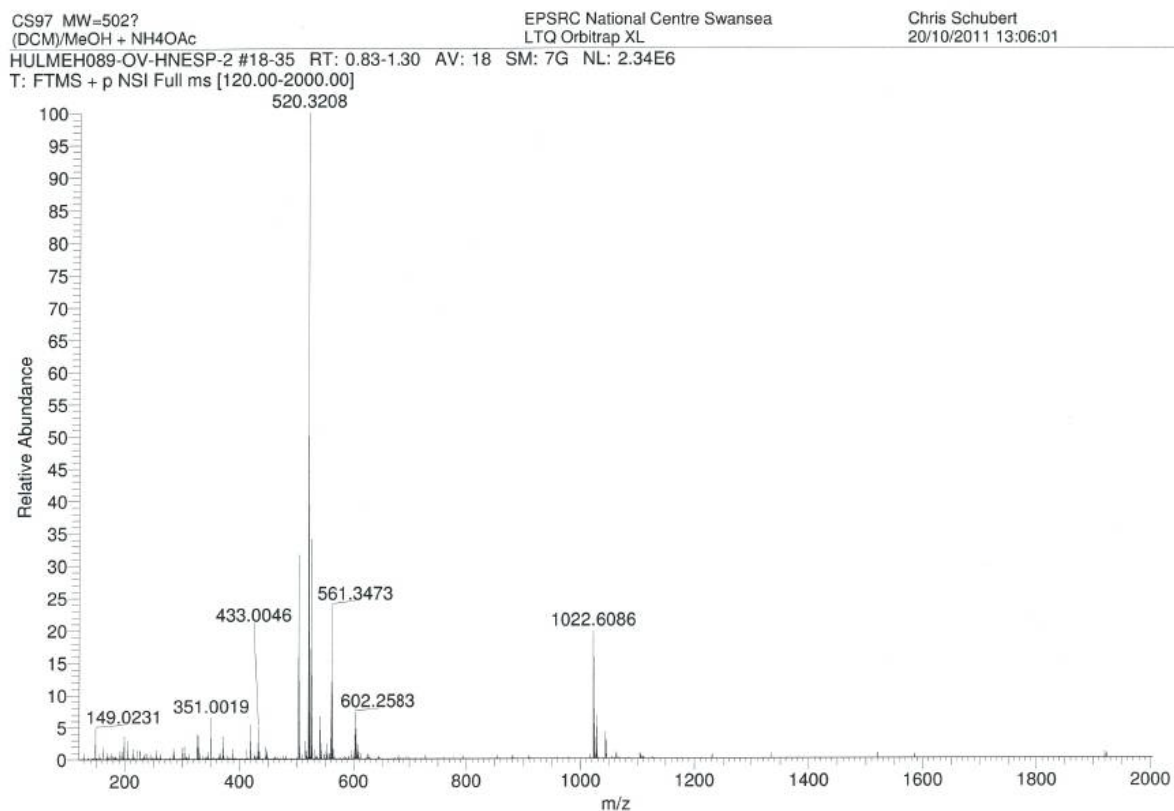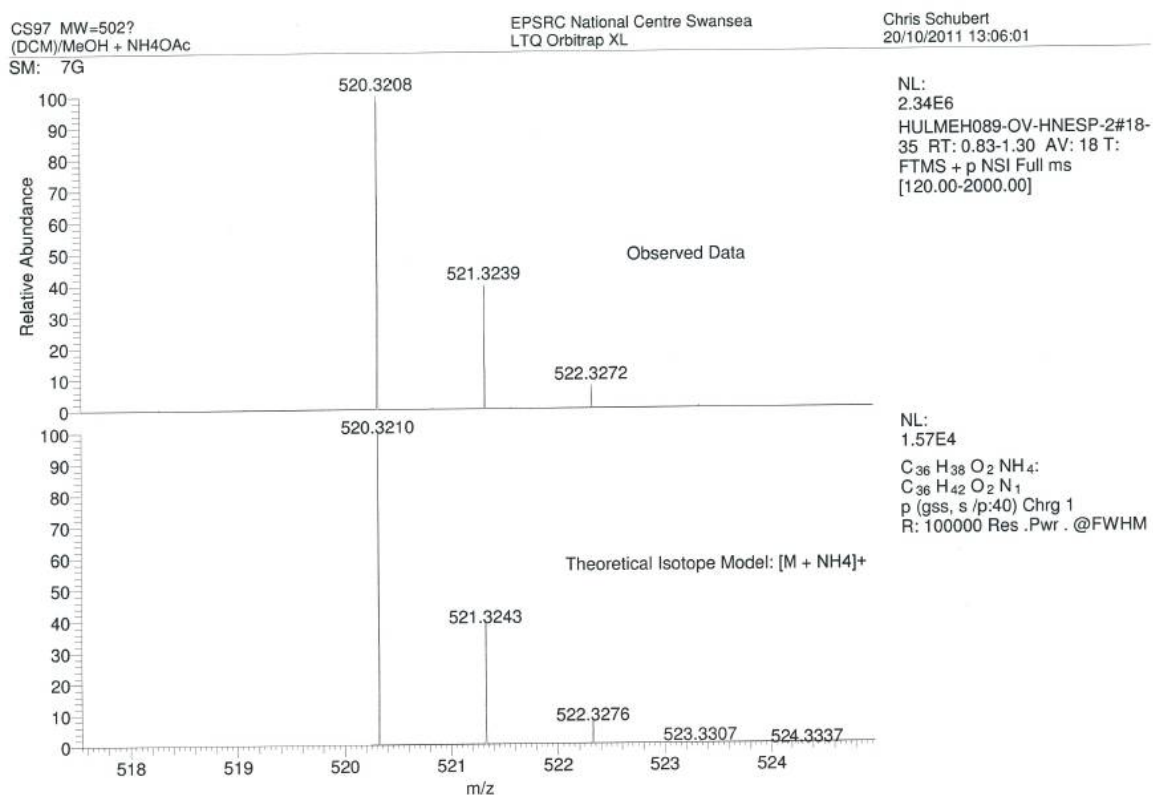

## Dimer (1)

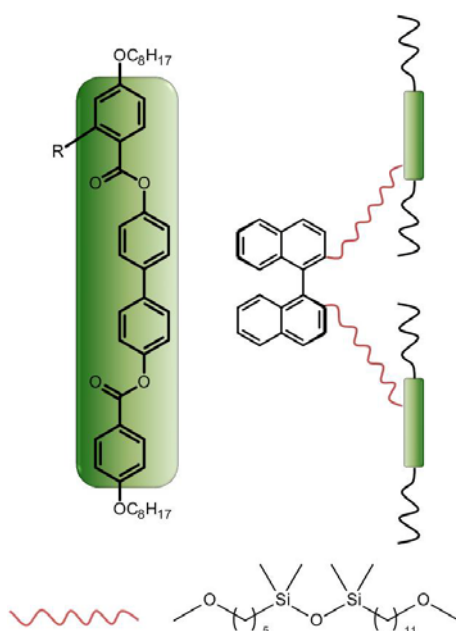

To a solution of (*S*)-2,2'-di(4-pentenyl)-1,1'-binaphthalene **4** (0.19 g, 0.47 mmol) in anhydrous toluene (30 mL) was added 4-octyloxy-biphenyl-4-yl 4-octyloxy-2-[11-(1,1,3,3-tetramethyldisiloxanyl)-undec-1-yloxybenzoate **8** (0.94 g, 0.99 mmol). A stream of anhydrous air was passed through the solution for 5 minutes before adding Karstedt's catalyst (30  $\mu$ L, ~2% in xylenes) and stirring for 16 hours at ambient temperature. The solvent was removed under reduced pressure and the crude product purified initially by graduated silica gel column chromatography (Hexane/DCM 1:1, 3:2) and then by subsequent silica gel column chromatography (Toluene/DCM 2:1) to afford the *title compound* as white solid (0.69 g, 63%),  $[\alpha]_D^{22}$  -9.82 (*c* 0.01, chloroform).  $\delta_H$  (400 MHz,  $CDCl_3$ ) 8.29 (4H, d, *J* 9.9), 8.18 (2H, d, *J* 9.4), 8.01 (2H, d, *J* 9.9), 7.93 (2H, d, *J* 9.0), 7.68 (8H, m), 7.44 (2H, d, *J* 9.9), 7.16-7.34 (14H, m), 6.97 (4H, d, *J* 9.9), 6.48 (4H, m), 3.70 (12H, m), 3.58 (4H, m), 1.25 (12H, m), 0.87 (12H, m), 0.61-0.79 (52H, m), 0.39 (4H, m), 0.24 (12H, t, *J* 7.68), -0.75 (12H, s), -0.79 (12H, s);  $\delta_C$  (101 MHz,  $CDCl_3$ ) 165.09, 164.56, 164.22, 163.66, 161.80, 154.61, 150.80, 150.57, 138.34, 137.90, 134.56, 134.29, 132.41, 129.31, 129.08, 128.24, 127.84, 126.08, 125.59, 123.45, 122.41, 122.19, 151.58, 120.78, 115.96, 114.39, 111.27, 105.36, 100.29, 69.82, 69.05, 68.42, 35.57, 31.90, 29.78, 29.74, 29.69, 29.53, 29.48, 29.43, 29.37, 29.32, 29.23, 29.20, 26.09, 23.38, 22.91, 22.76, 18.49, 18.26, 14.21, 0.48, 0.42; MALDI-MS: isotopic cluster at  $m/z$  2352.3 ( $M+Na^+$ , 100%);

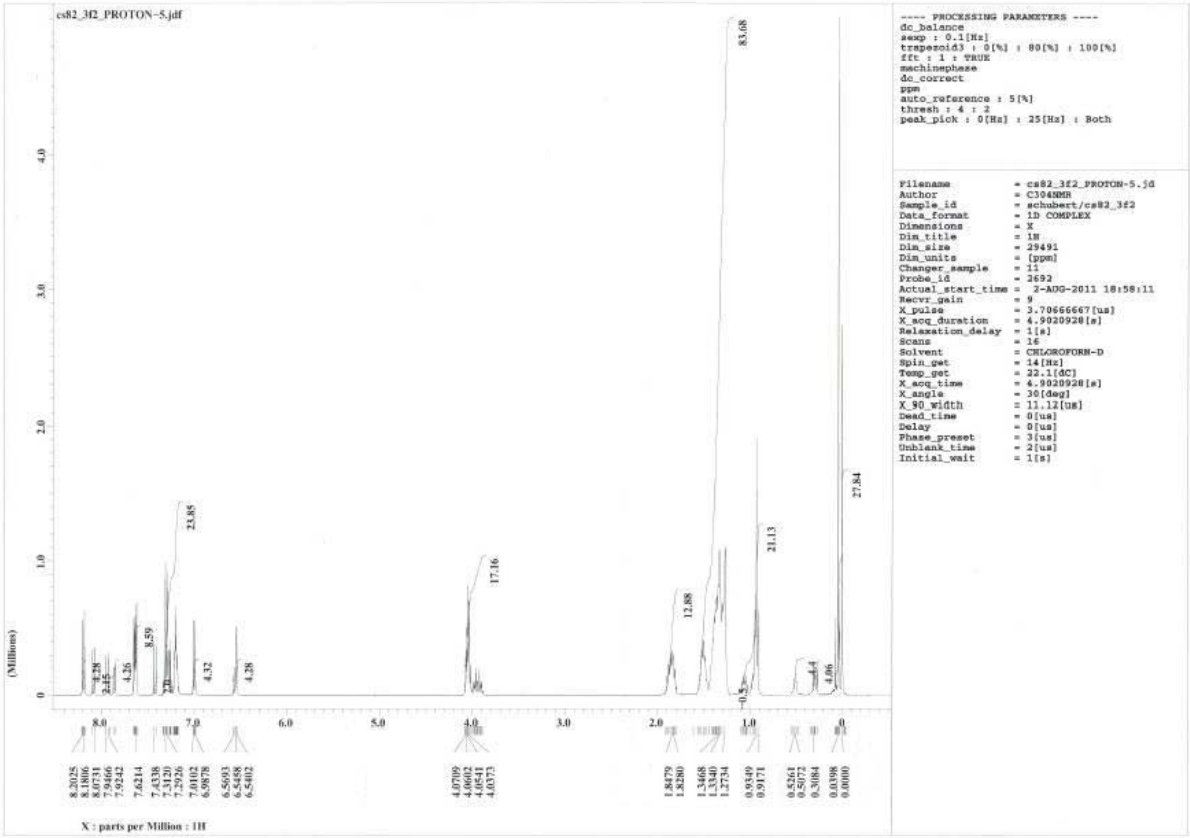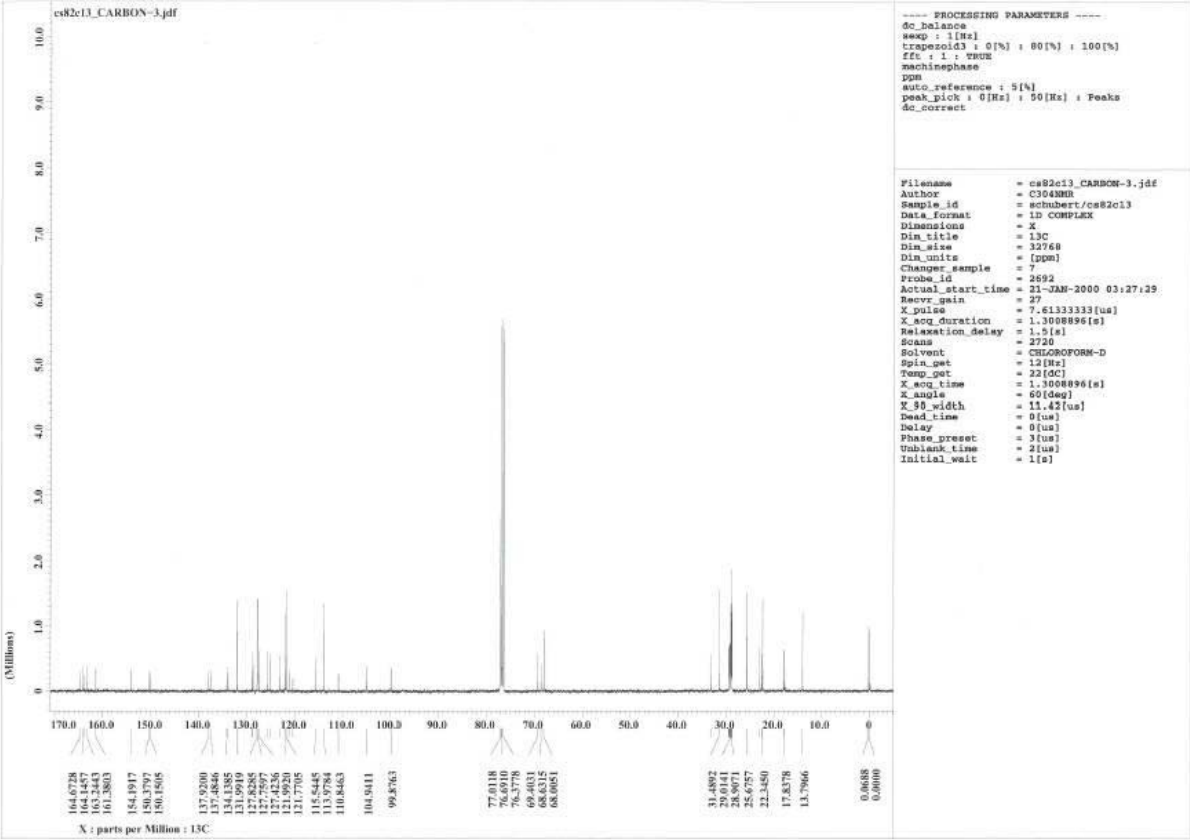

**EPSRC National Mass Spectrometry Service Centre (NMSSC), Swansea**  
<<HULMEH087-VA-MAP\_0001>> Voyager Spec #1=>AdvBC(64,0.5,0.1)=>NF0.7[BP = 2351.3, 5661]

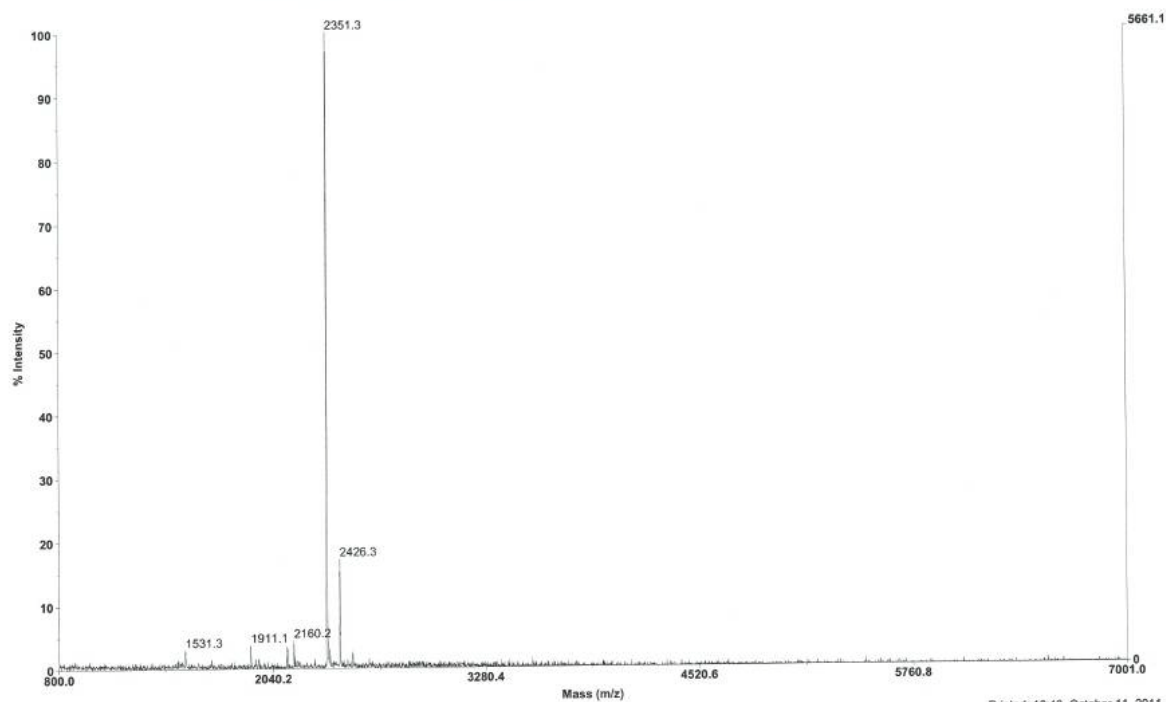

Acquired: 10:38:00, October 11, 2011  
Schubert CS82 Mw="2329"? THF PosRef [1:24] [Dilth;THF] + NaOAc  
D:\2011\Oct11\HULMEH087-VA-MAP\_0001.dat

Printed: 10:40, October 11, 2011

**EPSRC National Mass Spectrometry Service Centre (NMSSC), Swansea**  
<<HULMEH087-VA-MAP\_0001>> Voyager Spec #1=>AdvBC(64,0.5,0.1)=>NF0.7[BP = 2351.3, 5661]

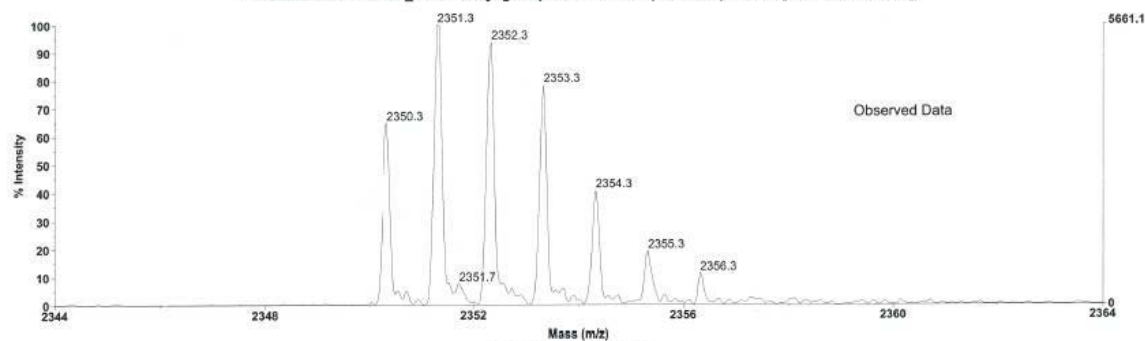

ISO:C144H198O18Si4Na

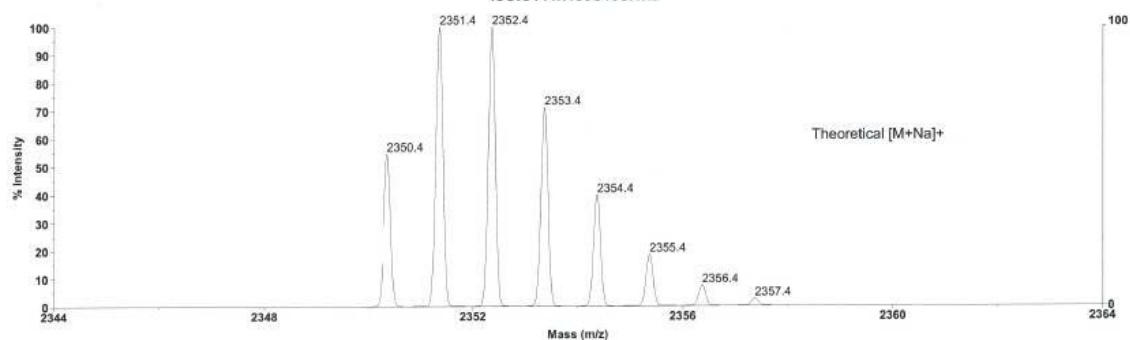

Acquired: 10:38:00, October 11, 2011  
Schubert CS82 Mw="2329"? THF PosRef [1:24] [Dilth;THF] + NaOAc  
D:\2011\Oct11\HULMEH087-VA-MAP\_0001.dat

Printed: 10:41, October 11, 2011

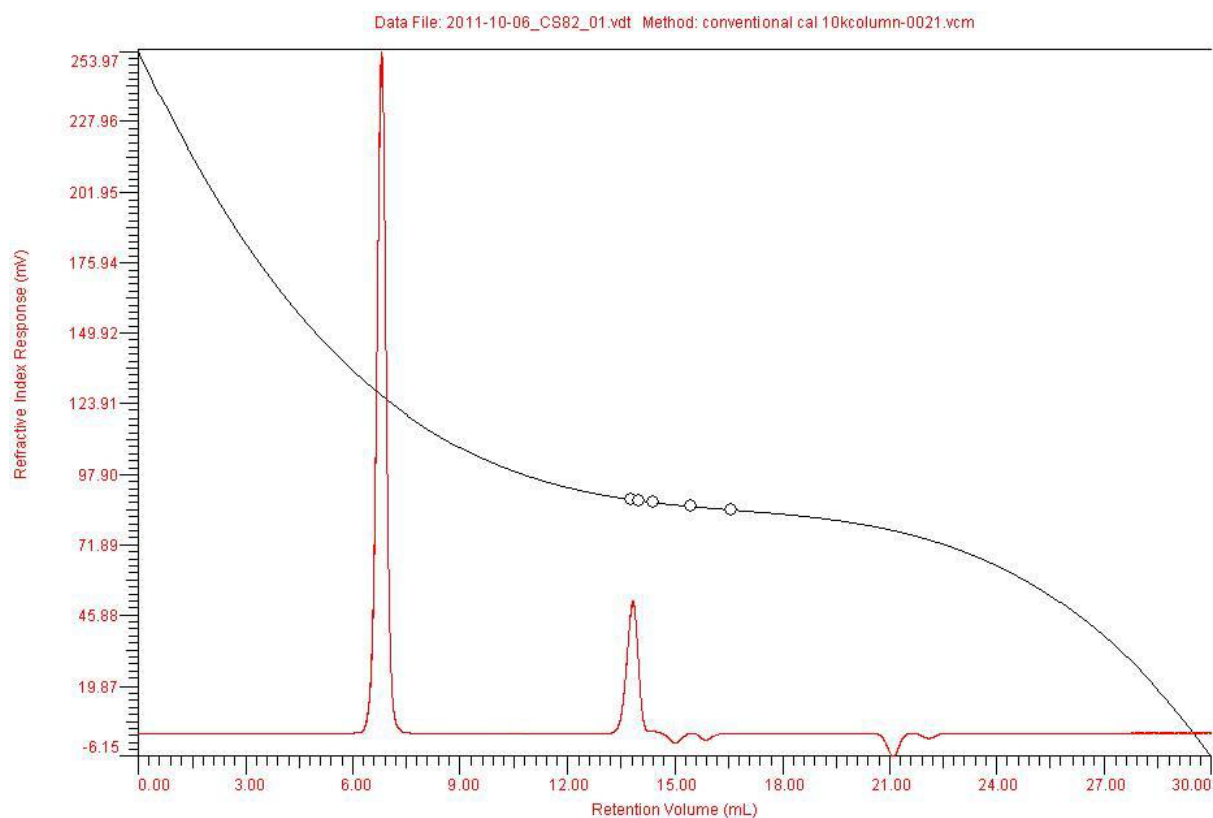

## Tetramer (2)

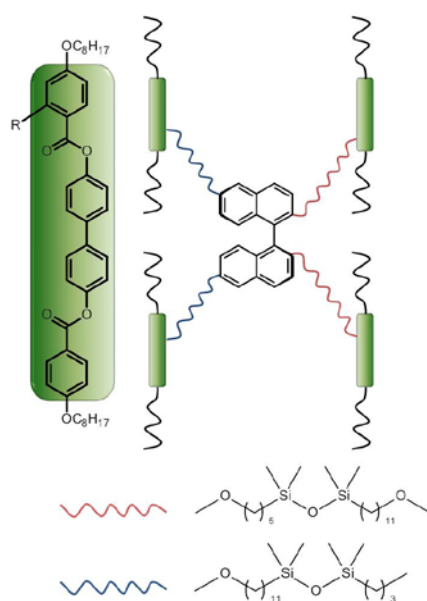

To a solution of (*S*)-6,6'-di(prop-2-enyl)-2,2'-di(4-pentenyl)-1,1'-binaphthalene **7** (0.032 g, 0.064 mmol) in anhydrous toluene (10 mL) was added 4-octyloxy-biphenyl-4-yl 4-octyloxy-2-[11-(1,1,3,3-tetramethyldisiloxanyl)-undec-1-yloxybenzoate **8** (0.31 g, 0.32 mmol). A stream of anhydrous air was passed through the solution for 5 minutes before adding Karstedt's catalyst (10  $\mu$ L, ~2% in xylenes) and stirring for 16 hours at ambient temperature. The solvent was removed under reduced pressure and the crude product purified initially by silica gel column chromatography (Hexane/DCM 1:2, 3:2) and then by subsequent graduated silica gel column chromatography (MeCN, MeCN/DCM 1:4) to afford the *title compound* as white solid (0.16 g, 57%),  $[\alpha]_D^{22}$  -1.20 (*c* 0.01, chloroform).  $\delta_H$  (400 MHz,  $CDCl_3$ ) 8.16 (8H, d, *J* 9.8), 8.04 (4H, d, *J* 9.6), 7.81 (2H, d, *J* 10.0), 7.60 (18H, m), 7.33 (2H, d, *J* 10.0), 7.27 (18H, d, *J* 9.8), 7.16 (2H, m), 6.98 (8H, d, *J* 9.9), 6.51 (8H, m), 4.04 (24H, m), 3.88 (4H, m), 2.70 (4H, m), 1.83 (24H, m), 1.29 (4H, m), 1.09-0.93 (160H, m), 0.91 (24H, t, *J* 7.2), 0.47-0.51 (12H, m), 0.01-0.02 (48H, m);  $\delta_C$  (101 MHz,  $CDCl_3$ ) 165.08, 164.57, 164.21, 163.67, 161.81, 154.08, 150.81, 150.58, 138.33, 137.90, 134.56, 132.79, 132.41, 129.51, 128.24, 128.17, 127.73, 126.25, 125.29, 122.41, 122.20, 121.59, 120.97, 116.13, 114.40, 111.27, 105.37, 100.30, 69.99, 69.06, 68.43, 39.74, 33.59, 31.91, 29.79, 29.75, 29.70, 29.54, 29.49, 29.44, 29.33, 29.24, 29.21, 26.10, 25.34, 23.40, 23.35, 22.99, 22.77, 18.51, 18.39, 18.30, 14.22, 1.42. 1.31, 0.50; MALDI-MS: isotopic cluster at *m/z* 4338.6 (*M*+Na<sup>+</sup>, 100%).

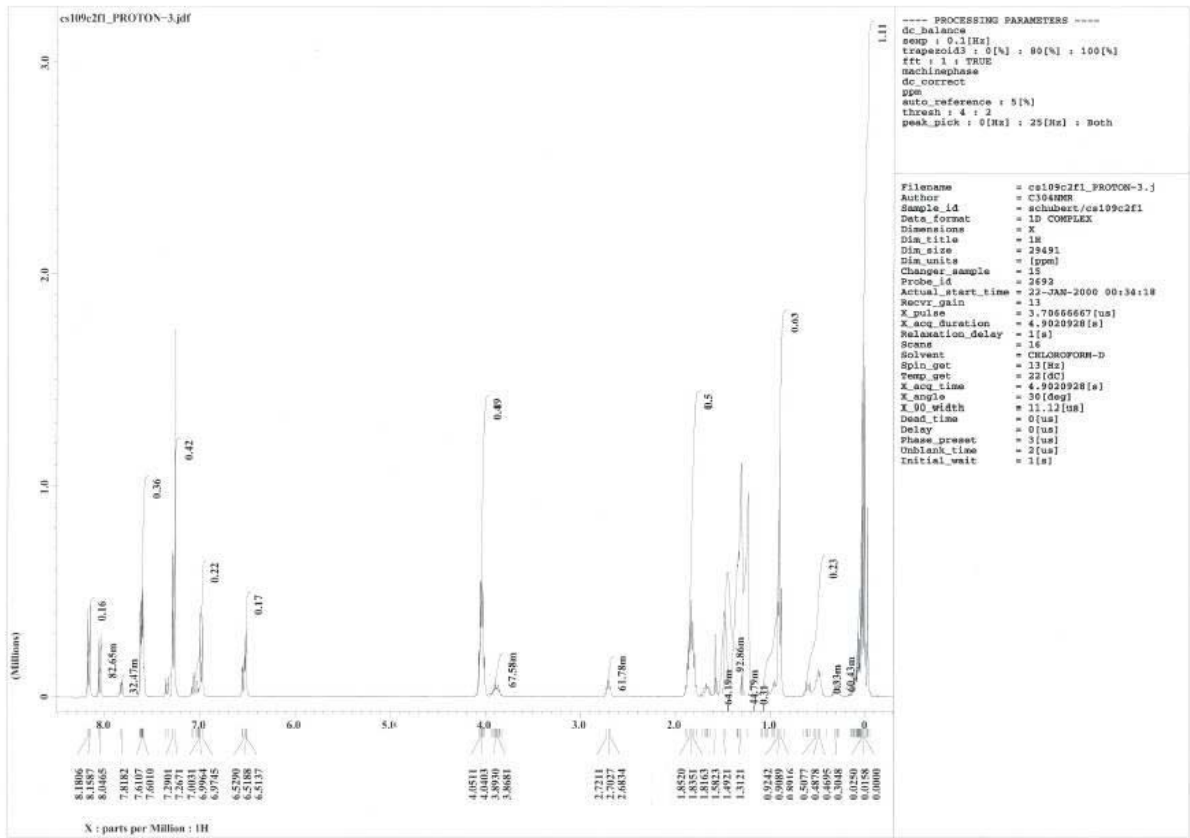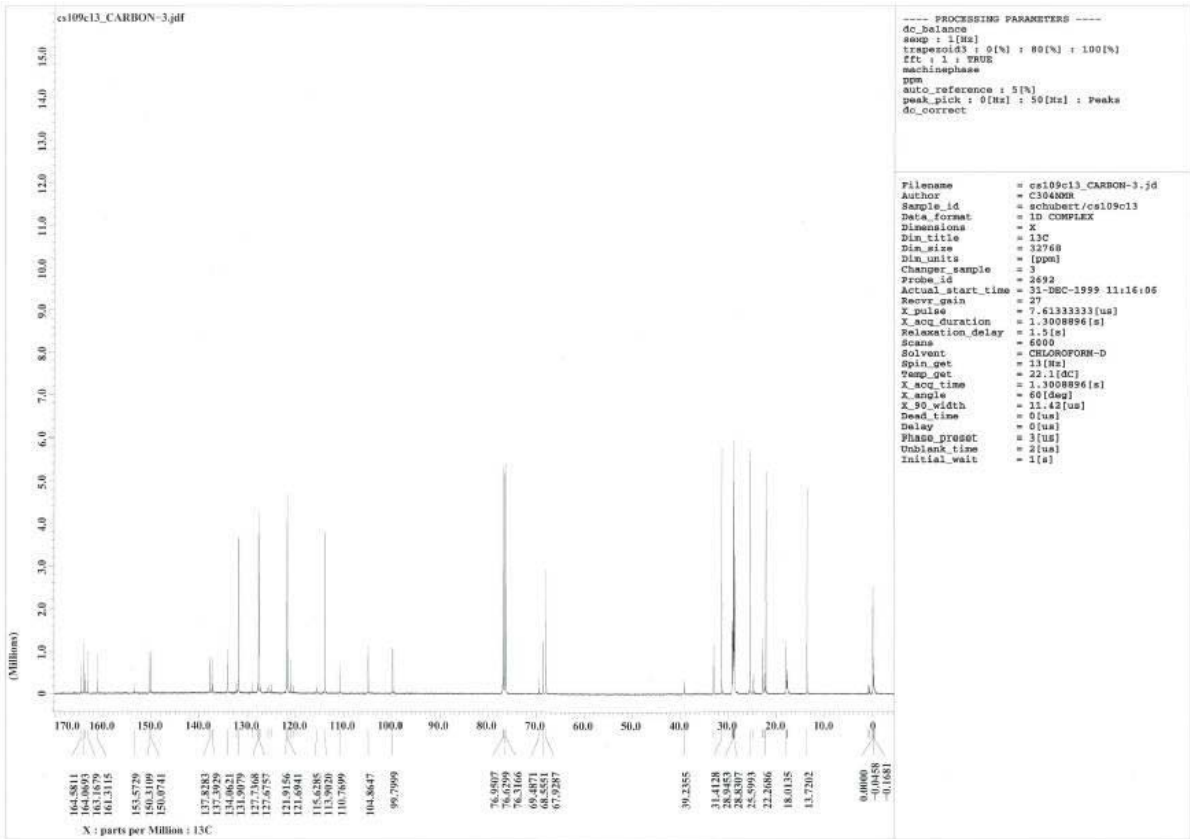

**EPSRC National Mass Spectrometry Service Centre (NMSSC), Swansea**  
 <<HULMEH086-VA-MAP\_0001>> Voyager Spec #1=>AdvBC(64,0.5,0.1)=>NF0.7[BP = 4338.6, 2155]

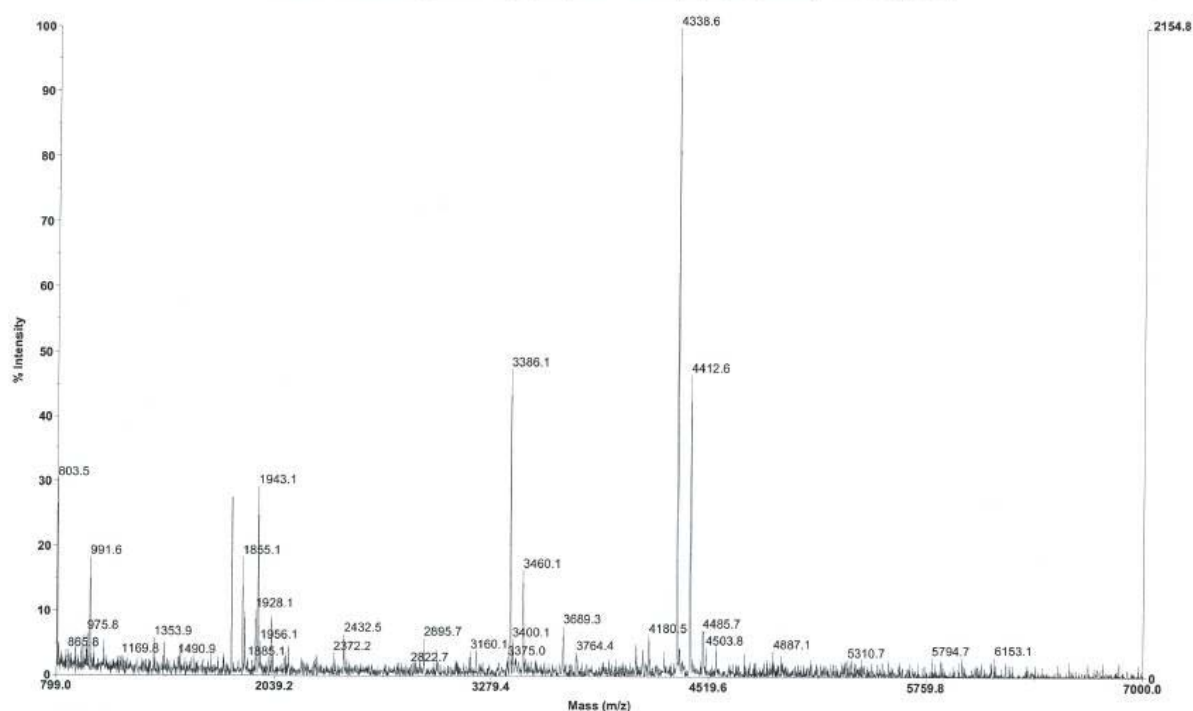

Acquired: 10:33:00, October 11, 2011  
 Schubert CS109 Mw="4316"? THF PosRef [1:24] [Dilth;THF] + NaOAc  
 D:\2011\Oct11\HULMEH086-VA-MAP\_0001.dat

Printed: 10:41, October 11, 2011

**EPSRC National Mass Spectrometry Service Centre (NMSSC), Swansea**  
 <<HULMEH086-VA-MAP\_0001>> Voyager Spec #1=>AdvBC(64,0.5,0.1)=>NF0.7[BP = 4338.6, 2155]

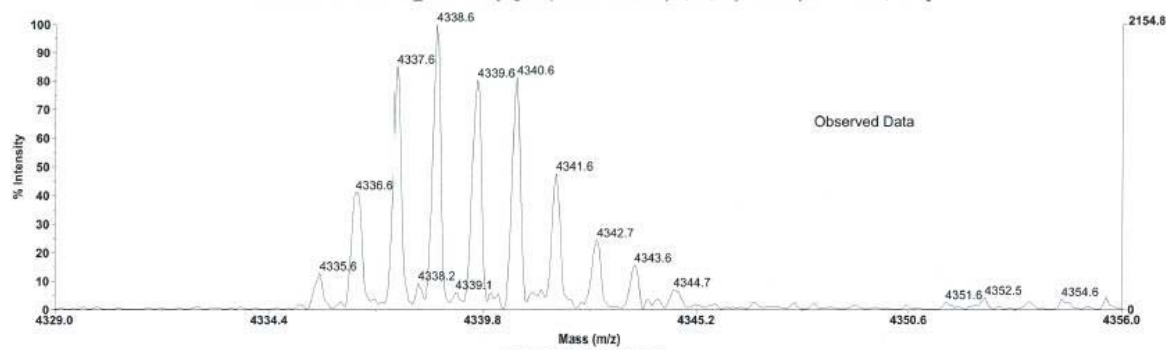

ISO:C264H374O34Si8Na

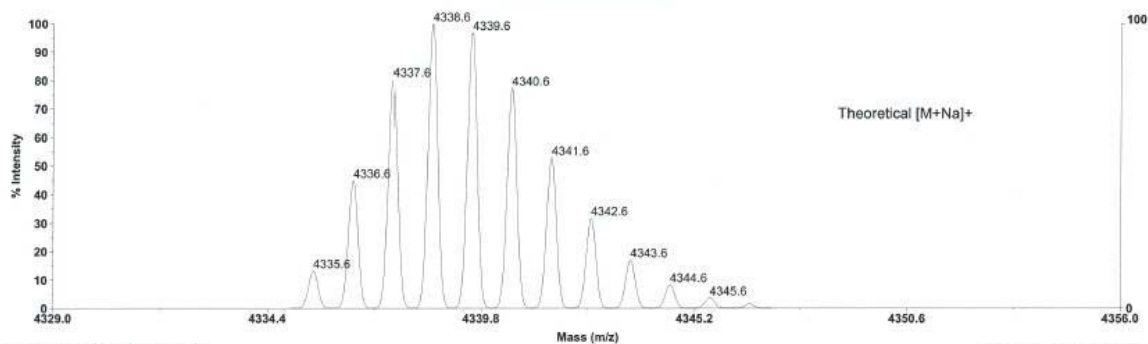

Acquired: 10:33:00, October 11, 2011  
 Schubert CS109 Mw="4316"? THF PosRef [1:24] [Dilth;THF] + NaOAc  
 D:\2011\Oct11\HULMEH086-VA-MAP\_0001.dat

Printed: 10:43, October 11, 2011

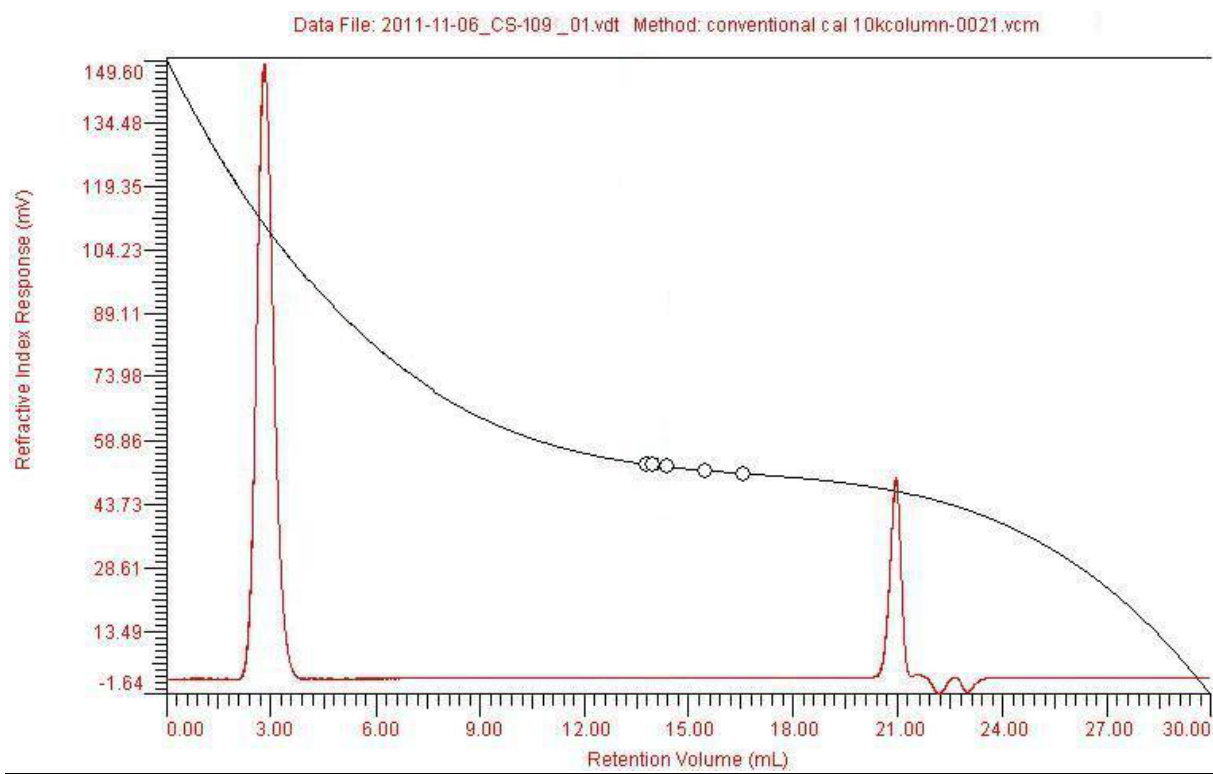

## Liquid Crystal Analysis

### X-ray Diffraction (XRD)

#### Dimer 1

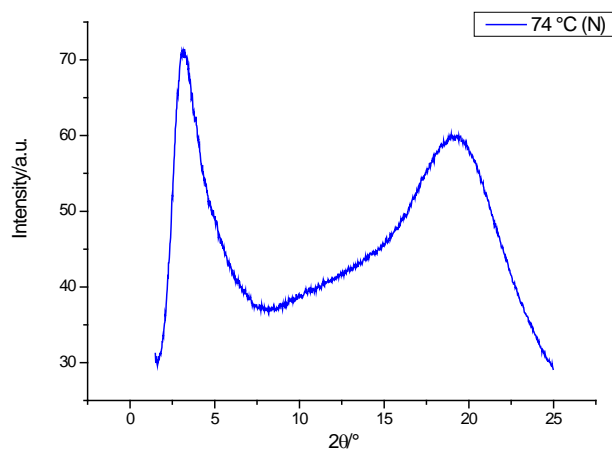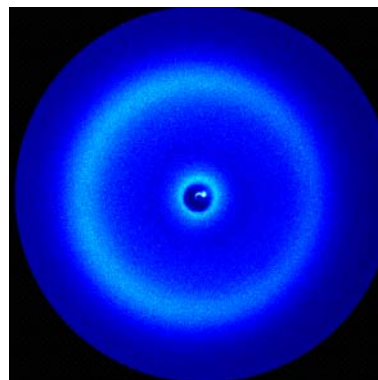

On cooling  
Temp = 74 °C  
Nematic  
Distance detector to sample = 300 mm  
Exposure time = 300 sec

| 2 $\theta$ | $\theta$ | <i>d</i> -value (nm) |
|------------|----------|----------------------|
| 3.2347     | 1.6174   | 2.7313               |
| 18.9870    | 9.4935   | 0.4674               |

#### Tetramer 2

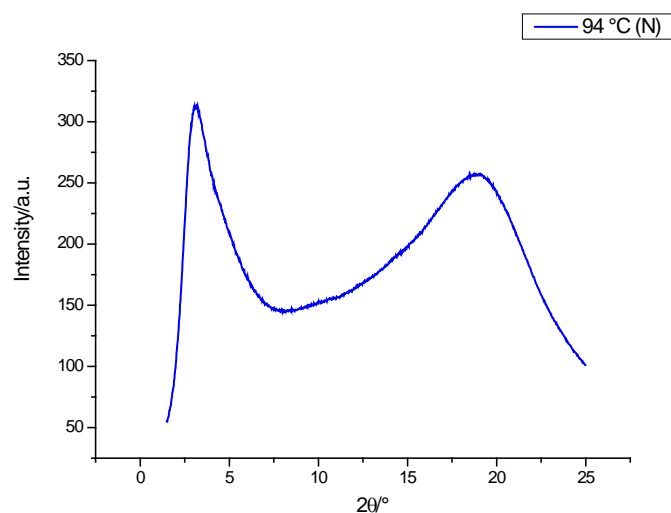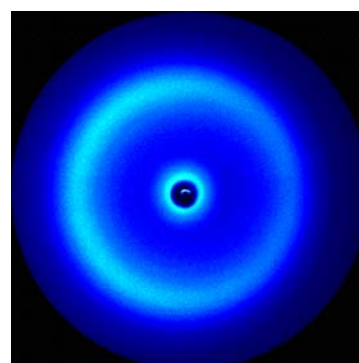

On cooling  
Temp = 94 °C  
Nematic  
Distance detector to sample = 300 mm  
Exposure time = 300 sec

| 2 $\theta$ | $\theta$ | <i>d</i> -value (nm) |
|------------|----------|----------------------|
| 3.1792     | 1.5896   | 2.7790               |
| 18.7310    | 9.3655   | 0.4737               |

### Optical Polarising Microscopy (OPM)

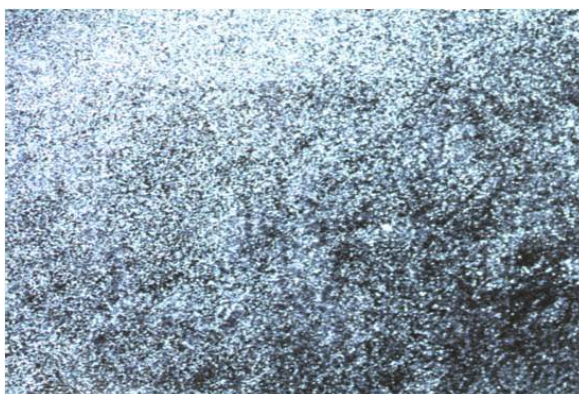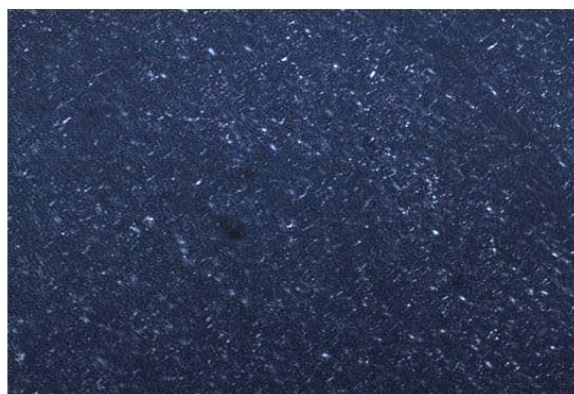

Optical polarising microscopy textures of dimer **1** (left) at 77°C and tetramer **2** (right) at 85°C

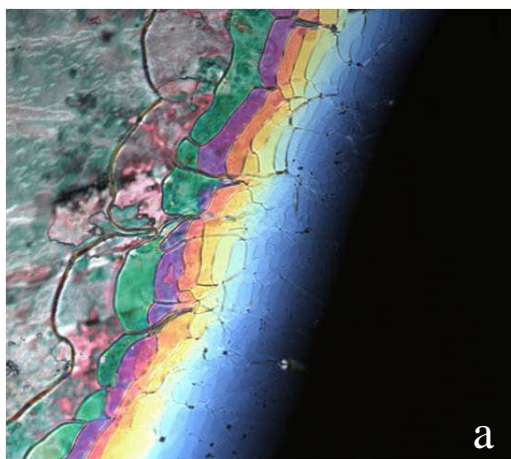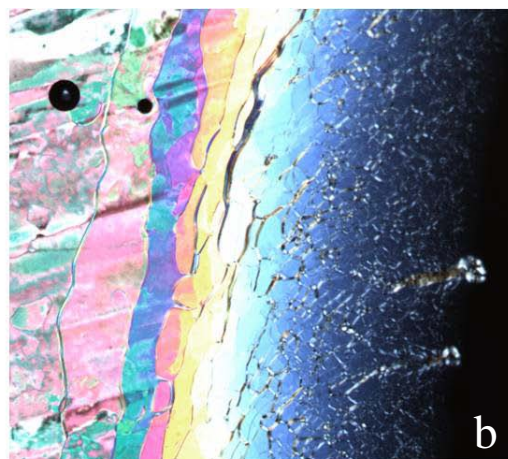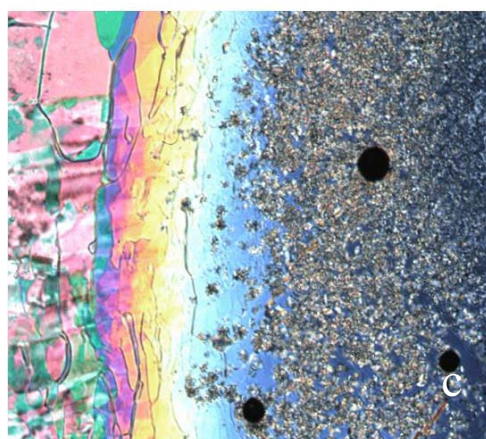

Optical polarising microscopy textures of contact experiment between compound **1** and nematic precursor **8** at (a) 96 °C – nematic mesogen and isotropic compound **1**; (b) 85 °C – nematic mesogen and chiral nematic compound **1**; (c) 47 °C – nematic mesogen and crystalline compound **1**

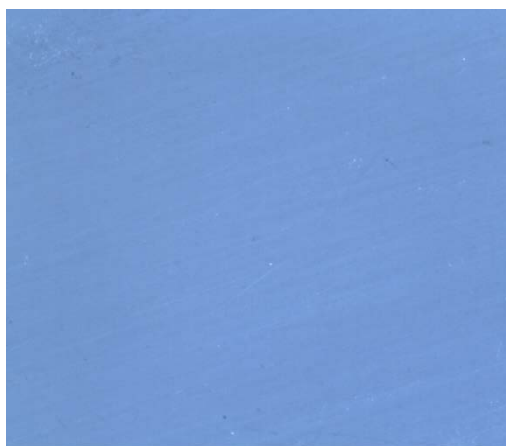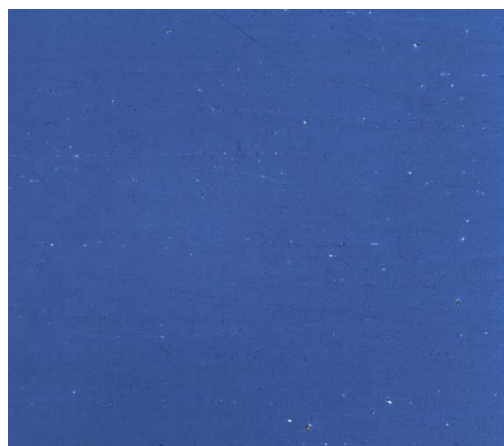

OPM textures of compounds **1** (left) at 70 °C and **2** (right) at 90 °C in electro-optical polyimide coated planar aligned cells (2.0  $\mu\text{m}$  thickness) on cooling.

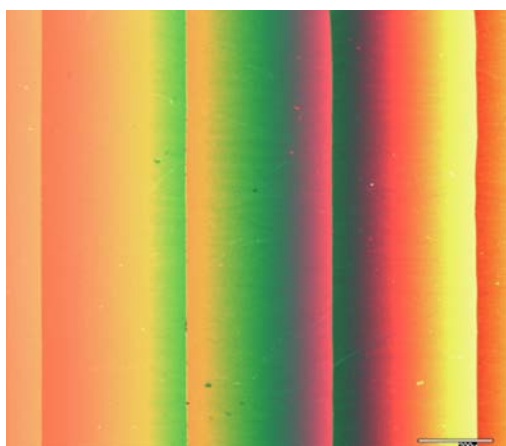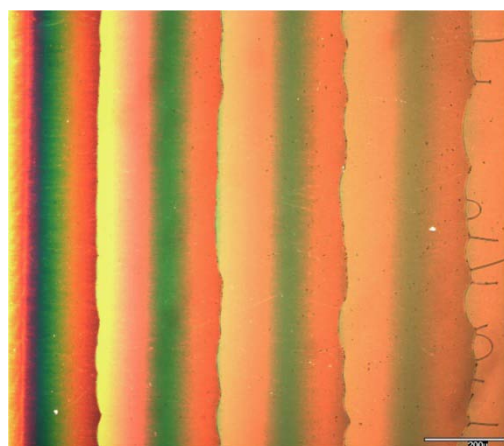

Helical twisting power measurements of compounds **1** (left) and **2** (right) using Grandjean-Cano wedge cells (0.3 mm,  $\tan\theta$  0.0083) in ~5% w/w concentration in 4-pentyl-4'-cyanobiphenyl (5CB) at ambient temperature

Differential Scanning Calorimetry (DSC)

Compound 1

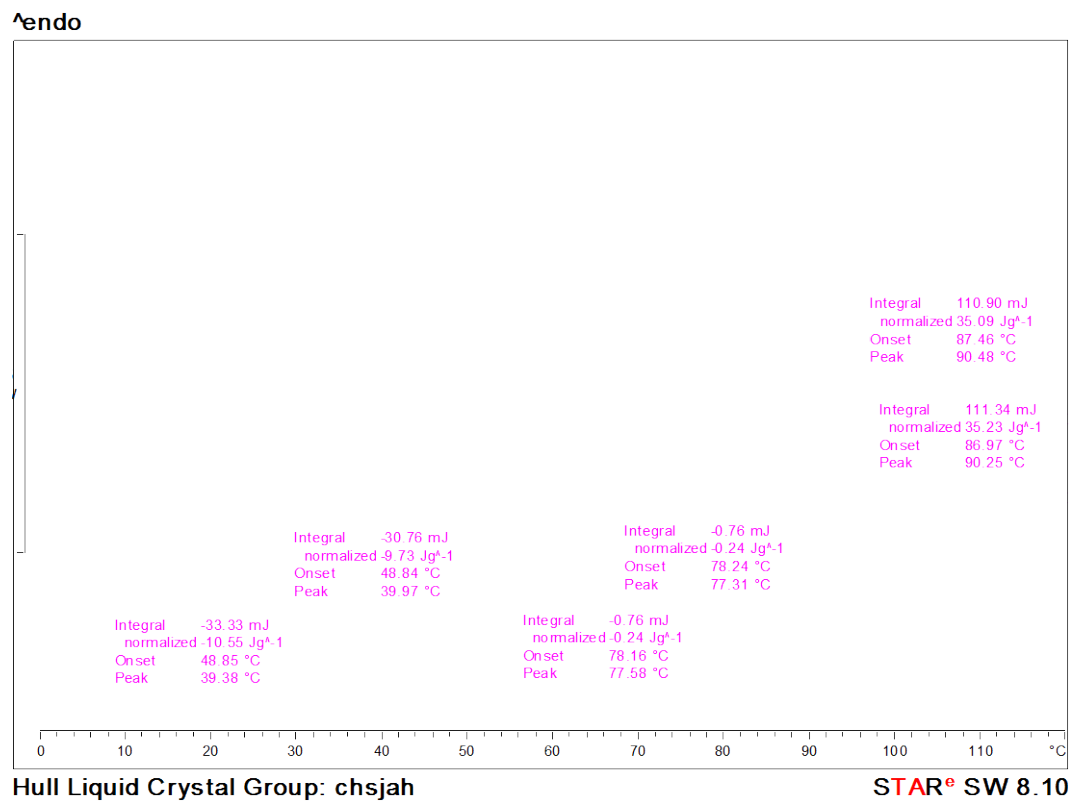

Compound 2

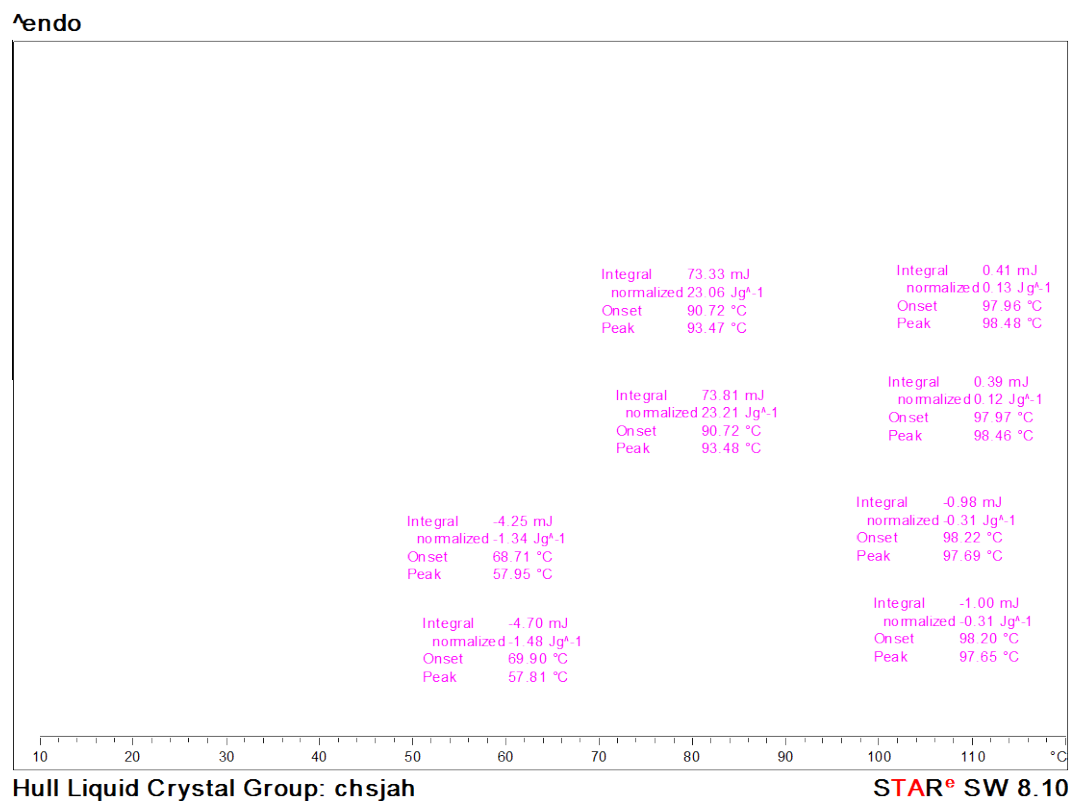

Supplement: c2cc33050d.pdf [file c2cc33050d.pdf]
